# Supplementary figures and images for: A one-step synthesis of a Ta3N5 nanorod photoanode from Ta plates and NH4Cl powder for photoelectrochemical water oxidation
Source: Royal Society of Chemistry journal article supplement (doi:10.1039/d0cc05044j), 2020-01-01

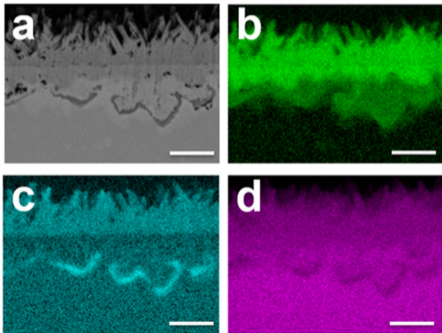

Supplement: d0cc05044j2.pdf [file d0cc05044j2.pdf]

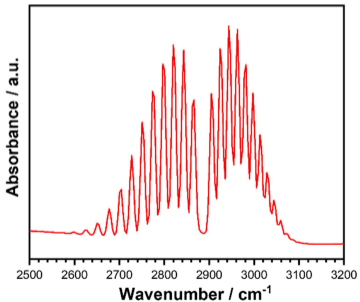

Supplement: d0cc05044j3.pdf [file d0cc05044j3.pdf]

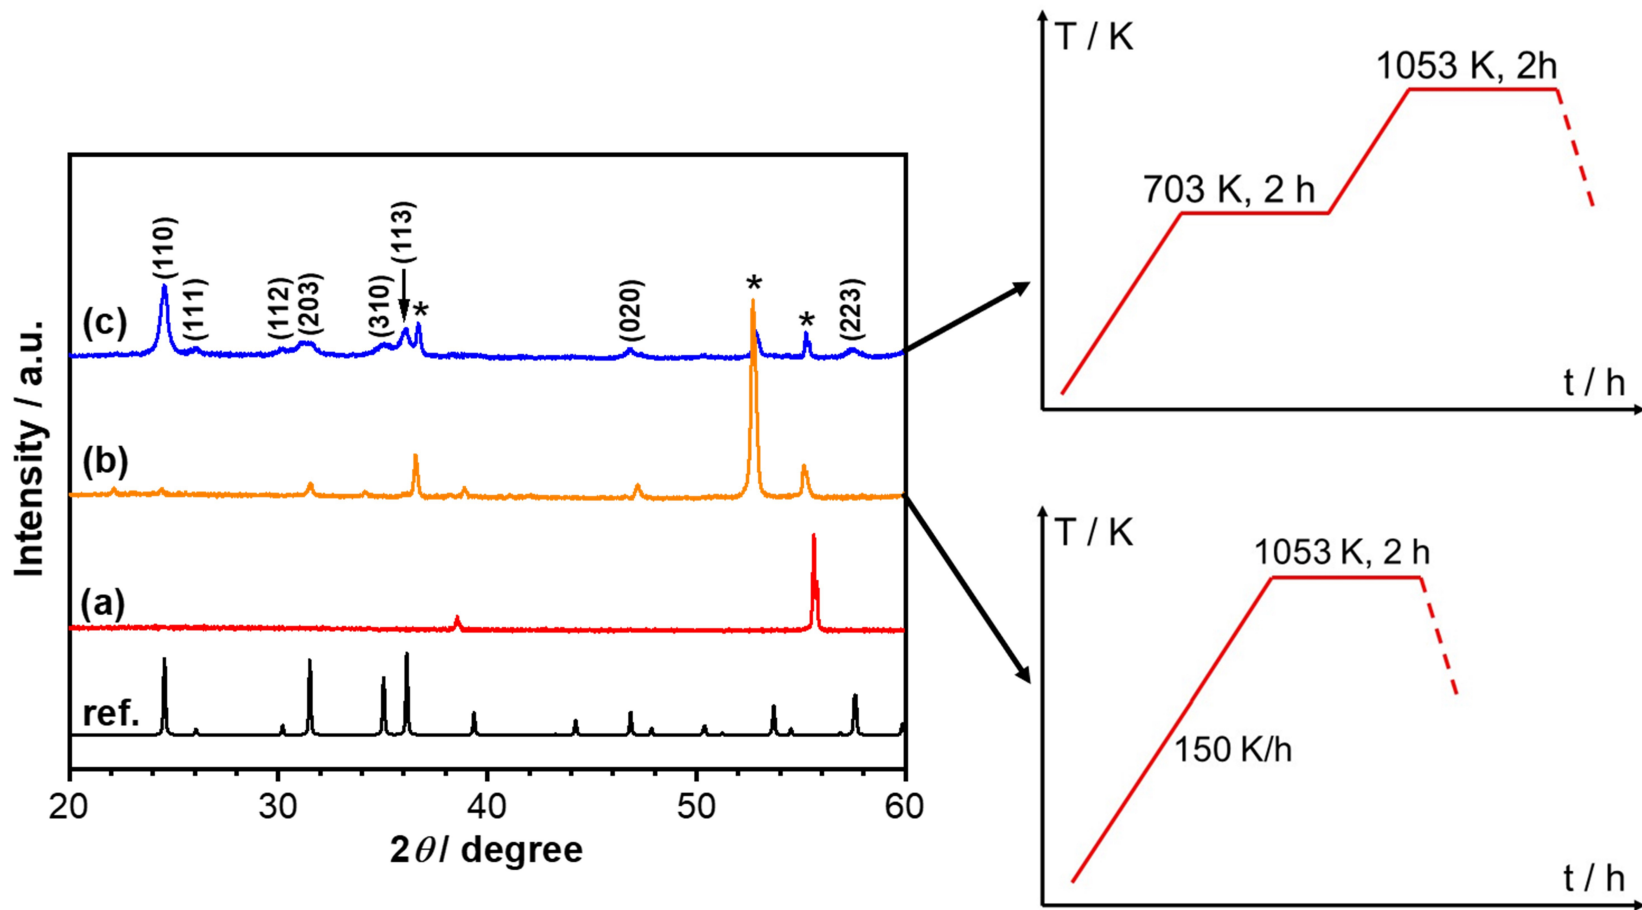

Supplement: d0cc05044j4.pdf [file d0cc05044j4.pdf]

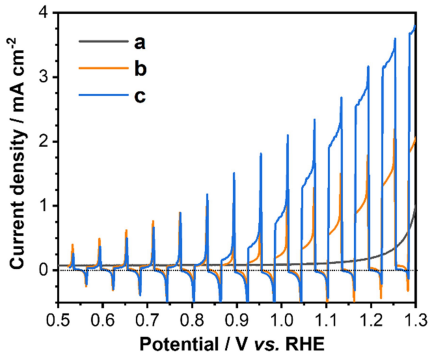

Supplement: d0cc05044j5.pdf [file d0cc05044j5.pdf]
